# Supplementary material
Source: MDPI journal article supplement (https://www.mdpi.com/2304-6740/11/4/144)
Supplement: s1 [file s1]

# Synthesis and structures of lead(II) complexes with hydroxy-substituted *closo*-decaborate anions

## SUPPORTING INFORMATION

**Table S1. Crystal data and structure refinement for compounds 1–3.**

| Compound                           | 1·CH <sub>3</sub> CN                                               | 2·0.5bipy·CH <sub>3</sub> CN                                                     | 3                                                                                |
|------------------------------------|--------------------------------------------------------------------|----------------------------------------------------------------------------------|----------------------------------------------------------------------------------|
| Empirical formula                  | C <sub>22</sub> H <sub>29</sub> B <sub>10</sub> N <sub>5</sub> OPb | C <sub>31</sub> H <sub>41</sub> B <sub>10</sub> N <sub>6</sub> O <sub>3</sub> Pb | C <sub>17</sub> H <sub>32</sub> B <sub>10</sub> N <sub>2</sub> O <sub>3</sub> Pb |
| Formula weight                     | 694.79                                                             | 860.99                                                                           | 627.73                                                                           |
| Temperature/K                      | 100.00                                                             | 100.00                                                                           | 100.00                                                                           |
| Crystal system                     | monoclinic                                                         | triclinic                                                                        | monoclinic                                                                       |
| Space group                        | P2 <sub>1</sub> /c                                                 | P-1                                                                              | P2 <sub>1</sub> /c                                                               |
| a/Å                                | 12.196(4)                                                          | 9.332(3)                                                                         | 16.444(4)                                                                        |
| b/Å                                | 12.397(5)                                                          | 12.312(4)                                                                        | 9.9311(17)                                                                       |
| c/Å                                | 19.739(4)                                                          | 16.170(4)                                                                        | 15.580(6)                                                                        |
| α/°                                | 90                                                                 | 98.931(12)                                                                       | 90                                                                               |
| β/°                                | 106.015(12)                                                        | 95.893(10)                                                                       | 106.575(16)                                                                      |
| γ/°                                | 90                                                                 | 97.553(13)                                                                       | 90                                                                               |
| Volume/Å <sup>3</sup>              | 2868.5(15)                                                         | 1805.0(10)                                                                       | 2438.5(12)                                                                       |
| Z                                  | 4                                                                  | 2                                                                                | 4                                                                                |
| Q <sub>calc</sub> /cm <sup>3</sup> | 1.609                                                              | 1.584                                                                            | 1.710                                                                            |
| μ/mm <sup>-1</sup>                 | 5.908                                                              | 4.716                                                                            | 6.942                                                                            |
| F(000)                             | 1344.0                                                             | 850.0                                                                            | 1216.0                                                                           |
| Radiation                          | MoKα (λ = 0.71073)                                                 | MoKα (λ = 0.71073)                                                               | MoKα (λ = 0.71073)                                                               |
| 2θ range for data collection/°     | 3.924 to 57.996                                                    | 2.57 to 54.996                                                                   | 4.848 to 57.298                                                                  |
| Index ranges                       | -12 ≤ h ≤ 16,                                                      | -12 ≤ h ≤ 11,                                                                    | -22 ≤ h ≤ 22,                                                                    |
|                                    | -16 ≤ k ≤ 13,                                                      | -15 ≤ k ≤ 13,                                                                    | -13 ≤ k ≤ 13,                                                                    |
|                                    | -26 ≤ l ≤ 26                                                       | -20 ≤ l ≤ 20                                                                     | -20 ≤ l ≤ 20                                                                     |
| Reflections collected              | 14166                                                              | 13308                                                                            | 23410                                                                            |
| Independent reflections            | 7477                                                               | 8109                                                                             | 6250                                                                             |
|                                    | R <sub>int</sub> = 0.0365,<br>R <sub>sigma</sub> = 0.0665          | R <sub>int</sub> = 0.0354, R <sub>sigma</sub> = 0.0747                           | R <sub>int</sub> = 0.0331,<br>R <sub>sigma</sub> = 0.0318                        |
| Data/restraints/parameters         | 7477/3/302                                                         | 8109/0/444                                                                       | 6250/3/301                                                                       |
| Goodness-of-fit on F <sup>2</sup>  | 1.057                                                              | 1.038                                                                            | 1.055                                                                            |
| Final R indexes [I ≥ 2σ (I)]       | R <sub>1</sub> = 0.0539,<br>wR <sub>2</sub> = 0.1188               | R <sub>1</sub> = 0.0424,<br>wR <sub>2</sub> = 0.0871                             | R <sub>1</sub> = 0.0215,<br>wR <sub>2</sub> = 0.0399                             |
| Final R indexes [all data]         | R <sub>1</sub> = 0.0761,<br>wR <sub>2</sub> = 0.1274               | R <sub>1</sub> = 0.0547,<br>wR <sub>2</sub> = 0.0913                             | R <sub>1</sub> = 0.0283,<br>wR <sub>2</sub> = 0.0415                             |

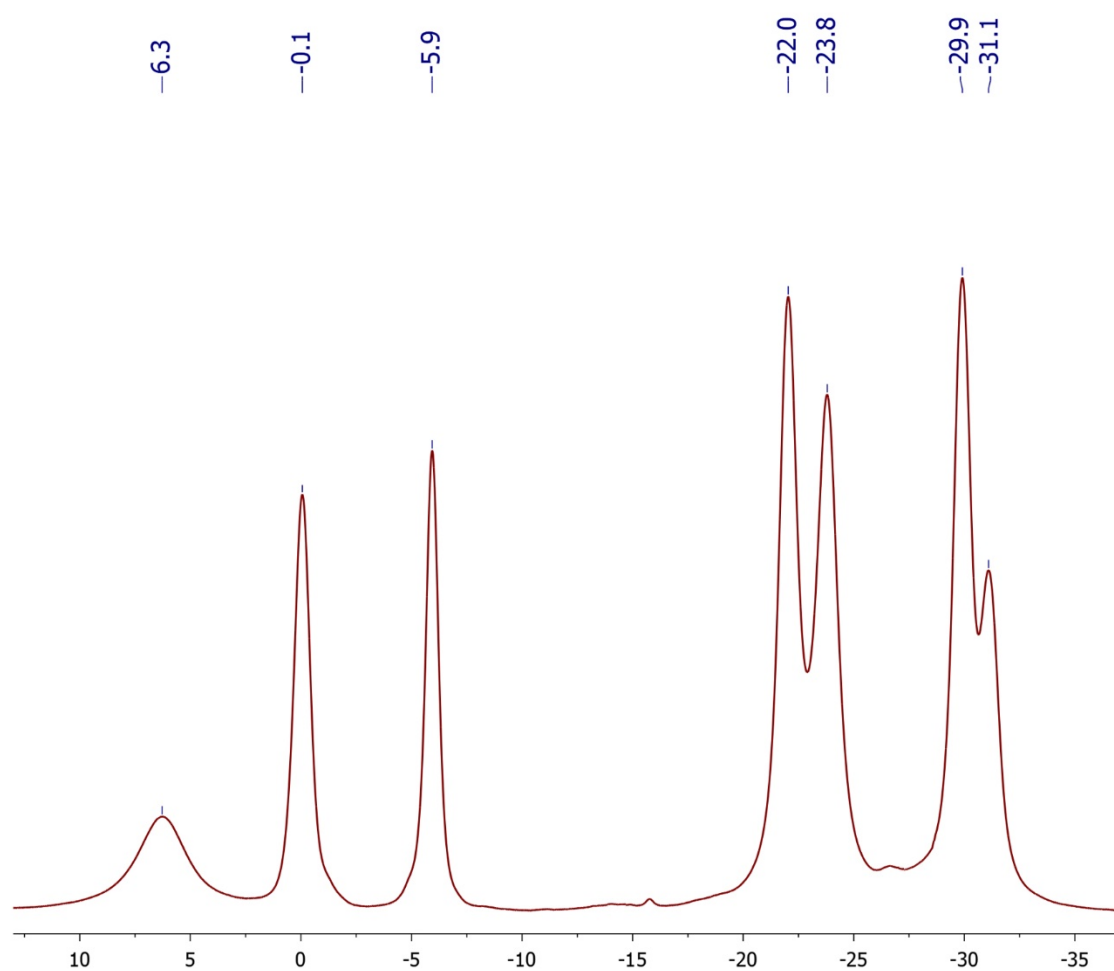

**Figure S1.**  $^{11}\text{B}$   $\{^1\text{H}\}$  NMR spectrum of  $\text{K}[\text{B}_{10}\text{H}_9\text{OC}_5\text{H}_{10}]$  in  $\text{CD}_3\text{CN}$

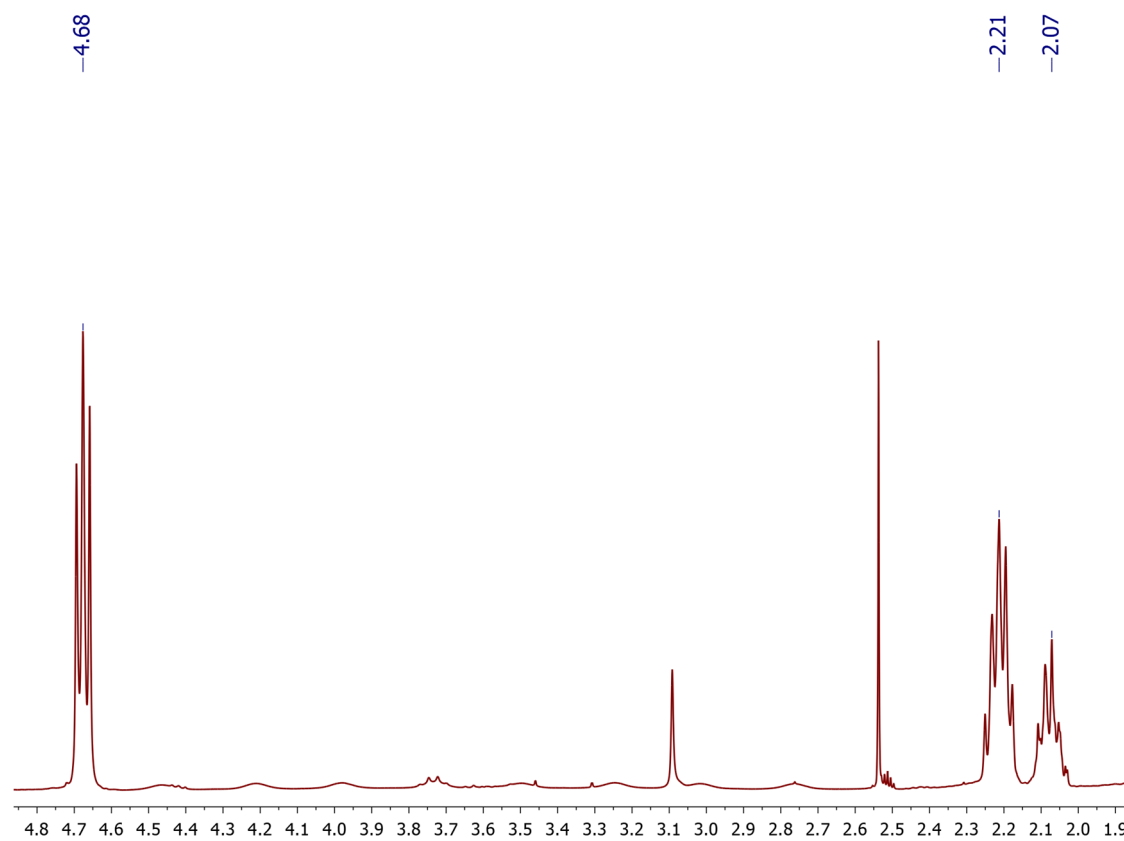

**Figure S2.**  $^1\text{H}$  NMR spectrum of  $\text{K}[\text{B}_{10}\text{H}_9\text{OC}_5\text{H}_{10}]$  in  $\text{CD}_3\text{CN}$

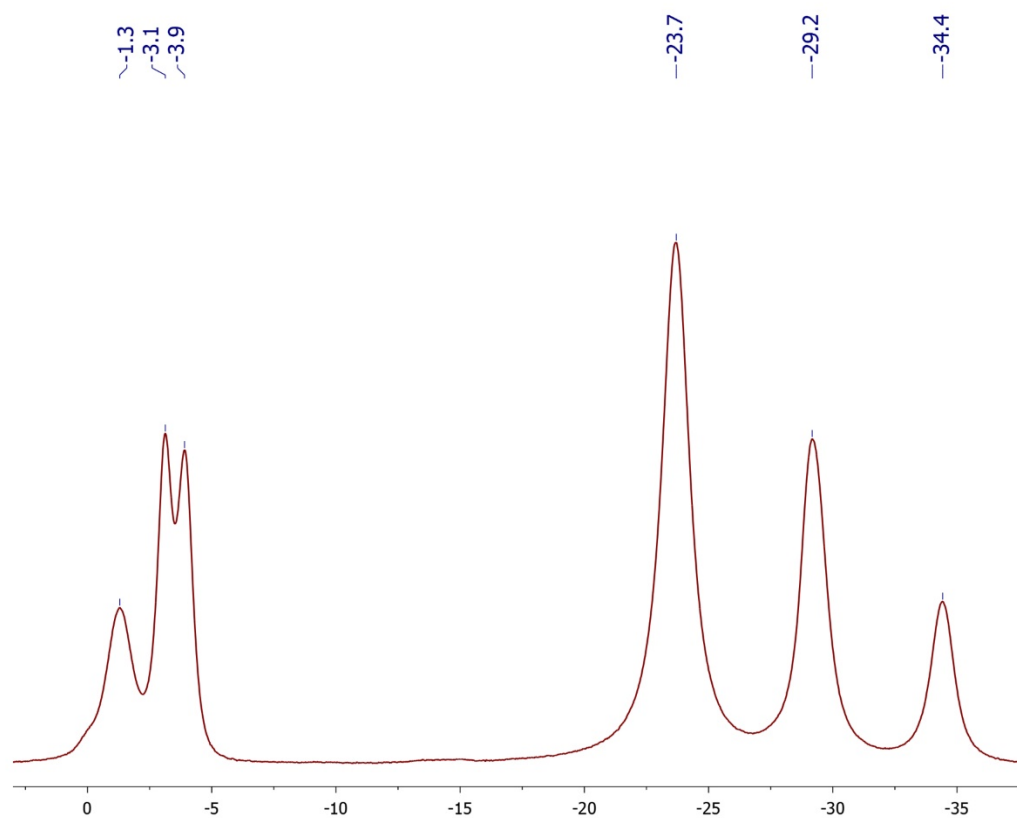

**Figure S3.**  $^{11}\text{B}$   $\{^1\text{H}\}$  NMR spectrum of  $\text{Cs}_2[\text{B}_{10}\text{H}_9\text{OCH}_2\text{CH}_2\text{CH}_2\text{CH}_2\text{CH}_2\text{OCH}_2\text{CH}_2\text{OH}]$  in  $\text{D}_2\text{O}$

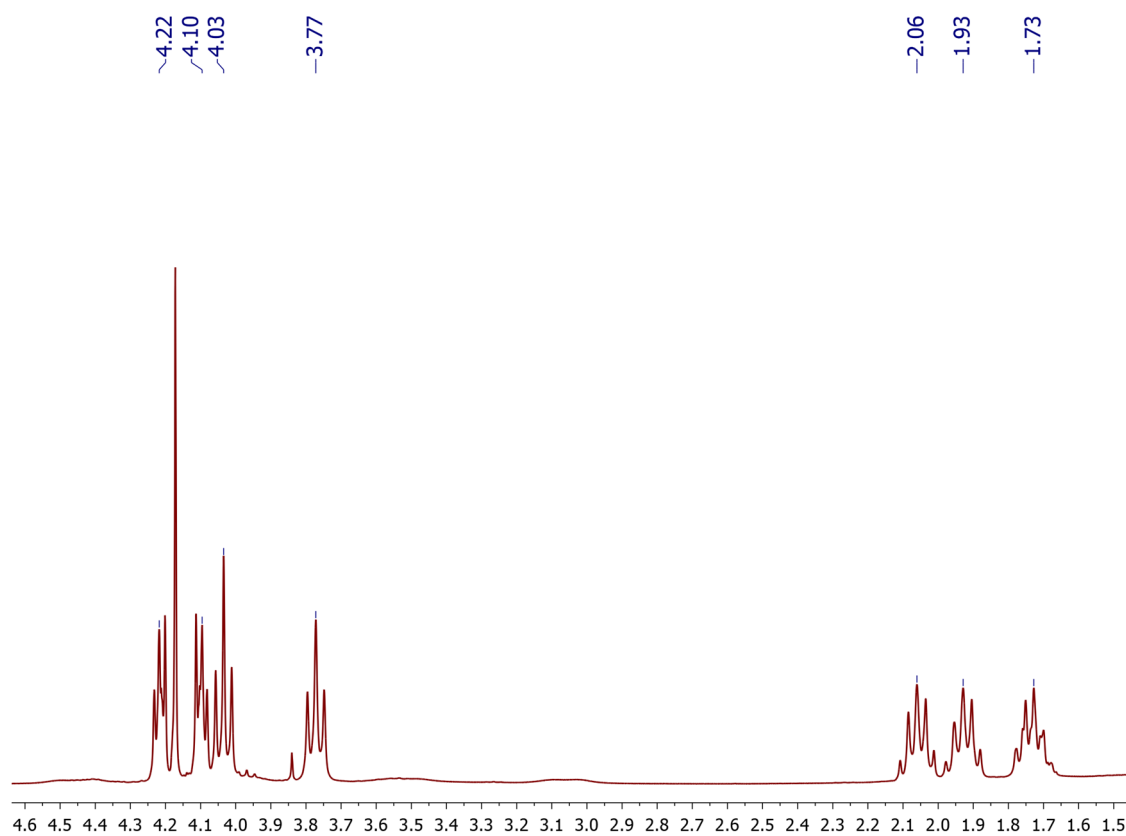

**Figure S4.**  $^1\text{H}$  NMR spectrum of  $\text{Cs}_2[\text{B}_{10}\text{H}_9\text{OCH}_2\text{CH}_2\text{CH}_2\text{CH}_2\text{CH}_2\text{OCH}_2\text{CH}_2\text{OH}]$  in  $\text{D}_2\text{O}$

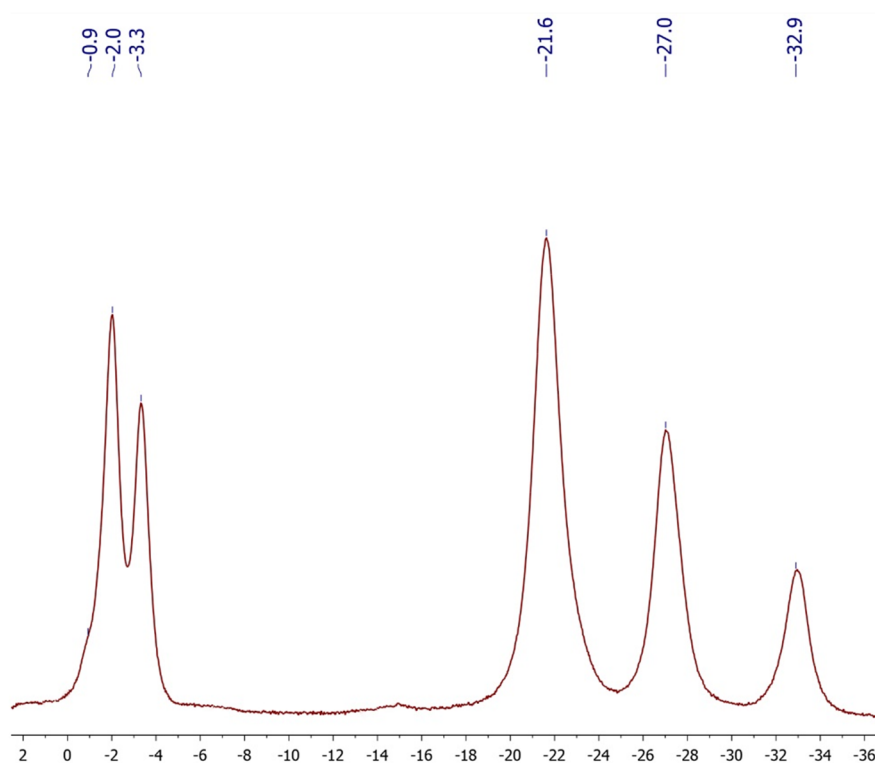

**Figure S5.**  $^{11}\text{B}$   $\{^1\text{H}\}$  NMR spectrum of  $[\text{Pb}(\text{bipy})_2[\text{B}_{10}\text{H}_9\text{OH}]]$  in  $\text{D}_2\text{O}$

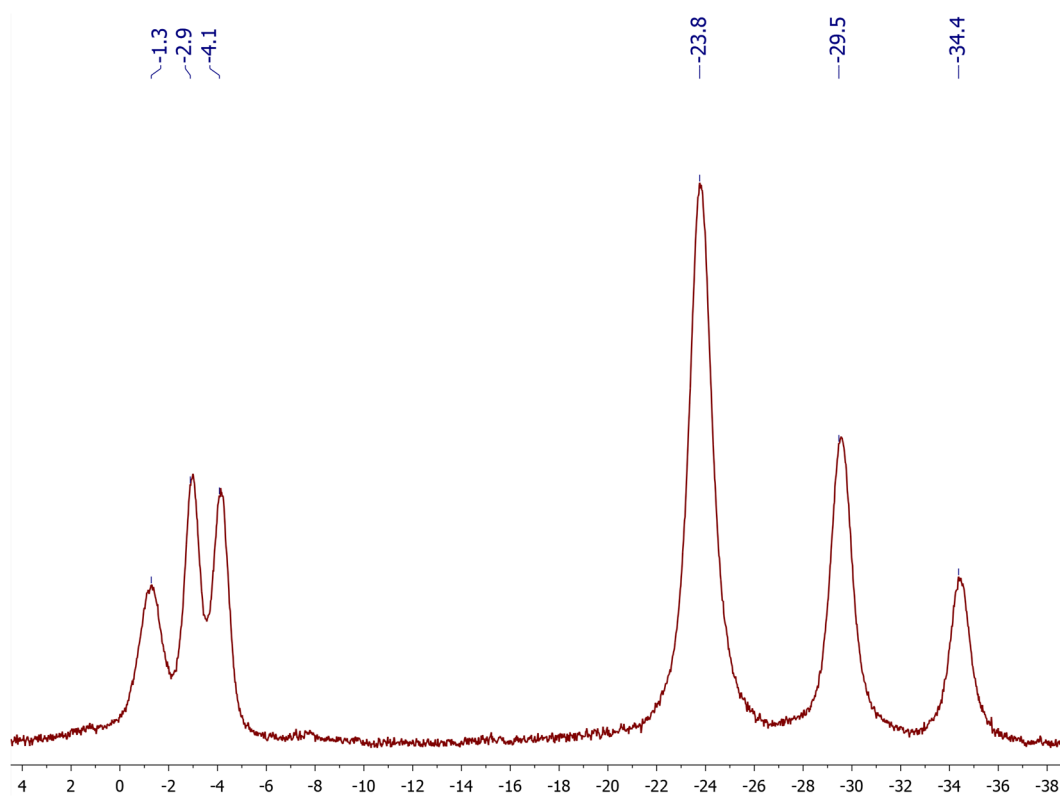

**Figure S6.**  $^{11}\text{B}$   $\{^1\text{H}\}$  NMR spectrum of  $[\text{Pb}(\text{bipy})_2[\text{B}_{10}\text{H}_9\text{O}(\text{CH}_2)_2\text{O}(\text{CH}_2)_2\text{OH}]]$  in  $\text{D}_2\text{O}$

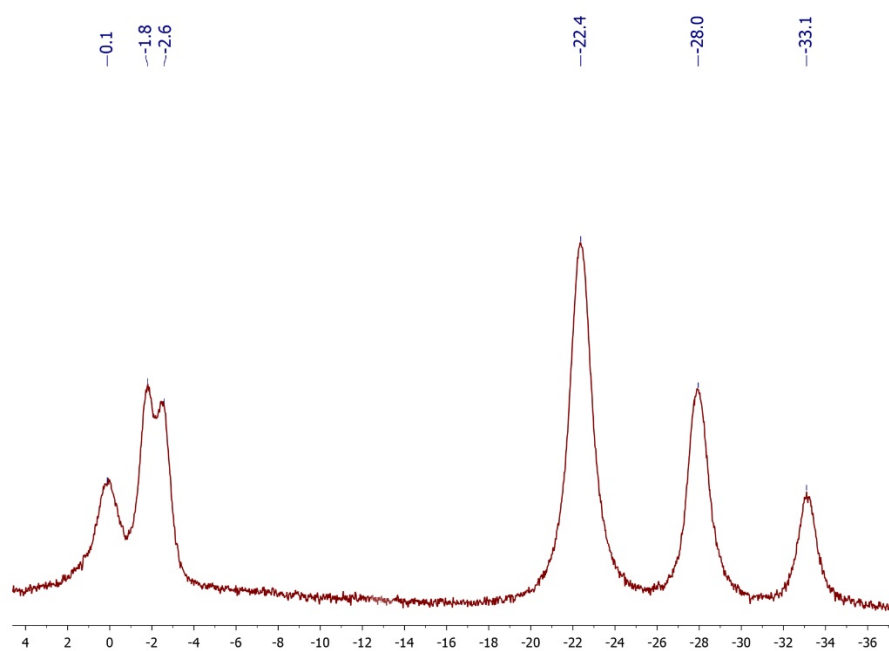

**Figure S7.**  $^{11}\text{B}\{^1\text{H}\}$  NMR spectrum of  $[\text{Pb}(\text{bipy})_2[\text{B}_{10}\text{H}_9\text{O}(\text{CH}_2)_5\text{O}(\text{CH}_2)_2\text{OH}]]_n$  in  $\text{D}_2\text{O}$
